# Supplementary material for: A role of OCRL in clathrin-coated pit dynamics and uncoating revealed by studies of Lowe syndrome cells
Source: eLife. 2014 Aug 8;3:e02975. doi: 10.7554/eLife.02975 (PMC4358339; doi:10.7554/eLife.02975)
Supplement: Supplementary file 1. — List of OCRL interaction partners recovered through quantitative label-free mass spectrometry proteomics. (A) Specific interaction partners of OCRL from label-free pulldowns of HeLaM-GFP vs HeLaM-GFP-OCRL near endogenous levels. (B) Specific interaction partners of OCRL from label-free pulldowns of HeLaM-GFP vs HeLaM-GFP-OCRL at 5X endogenous levels. DOI: http://dx.doi.org/10.7554/eLife.02975.024 [file elife02975s001.xlsx]

## Sheet: 1X
Supplementary file 1A (related to Figure 1 - figure supplemtent 1). Specific interaction partners of OCRL from label-free pulldowns of HeLaM-GFP vs HeLaM-GFP-OCRL near endogenous Levels
-log10(p value)	log2 (OCRL/GFP)	Majority protein IDs	Protein names	Gene names
4.76073	15.7323	Q01968; Q01968-2	Inositol polyphosphate 5-phosphatase OCRL-1	OCRL
5.38917	9.98082	Q14677	Clathrin interactor 1	CLINT1
5.85694	9.28884	P09496-2; P09496-4; P09496-3; P09496; F8WF69; F5H6N3; C9J8P9	Clathrin light chain A	CLTA
3.77738	7.94	Q86SQ0; E9PGF6; G5E9V3	Pleckstrin homology-like domain family B member 2	PHLDB2
3.43959	7.05627	Q00610-2; Q00610	Clathrin heavy chain 1	CLTC
4.95694	6.66672	Q6ICB4	Sesquipedalian-2	FAM109B
2.05528	5.58012	P09497-2; P09497	Clathrin light chain B	CLTB
3.94845	5.49135	K7EN12; Q9NW61; K7EIW9	Pleckstrin homology domain-containing family J member 1	PLEKHJ1
1.26156	5.34732	Q8IUD2; Q8IUD2-3; G8JLD3; Q8IUD2-2; Q8IUD2-4; Q8IUD2-5	ELKS/Rab6-interacting/CAST family member 1	ERC1
1.52948	5.17641	Q8N4B1; Q8N4B1-2	Sesquipedalian-1	FAM109A
4.51754	4.50524	O15083; H7C4G9	ERC protein 2	ERC2
1.61101	4.29164	Q15233-2; Q15233; C9IZL7	Non-POU domain-containing octamer-binding protein	NONO
1.23772	3.74411	E9PH29; P30048	Thioredoxin-dependent peroxide reductase, mitochondrial	PRDX3
1.37322	3.41573	Q96CW1-2; Q96CW1; E9PFW3	AP-2 complex subunit mu	AP2M1
1.90305	3.3986	P62491; B4DQU5; J3KQP6; H3BMH2; B4DT13; B4DMK0; H3BSC1; Q15907	Ras-related protein Rab-11A;Ras-related protein Rab-11B	RAB11A; RAB11B
2.2344	3.2531	Q5T3Q7; Q9H583; Q6P664	HEAT repeat-containing protein 1	HEATR1
0.92053	3.11984	O95782-2; O95782	AP-2 complex subunit alpha-1	AP2A1
1.62151	2.87655	Q9UHR5-2; Q9UHR5; J3QQJ0; J3KS14; F5H478; J3KRU5; J3QLH3	SAP30-binding protein	SAP30BP
1.75259	2.69953	Q14677-2; Q14677-3	Clathrin interactor 1	CLINT1
2.22838	2.65803	E9PS23; E9PP50; P23528	Cofilin-1	CFL1
1.23869	2.62877	B3KXH8; Q9Y5X1	Sorting nexin-9	SNX9
1.76627	2.47607	H3BTN5; P14618-2; P14618; H3BQ34; H3BT25; H3BUW1; H3BTJ2; P14618-3	Pyruvate kinase;Pyruvate kinase isozymes M1/M2	PKM
2.41132	2.38874	P23246; P23246-2	Splicing factor, proline- and glutamine-rich	SFPQ

## Sheet: 5X
Supplementary file 1B (related to Figure 1 - figure supplemtent 1). Specific interaction partners of OCRL from label-free pulldowns of HeLaM-GFP vs HeLaM-GFP-OCRL at 5X endogenous Levels
-log10(p value)	log2 (OCRL/GFP)	Majority protein IDs	Protein names	Gene names
4.74204	15.7849	Q01968; Q01968-2	Inositol polyphosphate 5-phosphatase OCRL-1	OCRL
6.19117	12.0562	Q14677	Clathrin interactor 1	CLINT1
6.6416	11.5871	P09496-2; P09496-4; P09496-3; P09496; F8WF69; F5H6N3; C9J8P9	Clathrin light chain A	CLTA
4.41934	10.4369	Q00610-2; Q00610	Clathrin heavy chain 1	CLTC
5.77654	9.60881	P20340-2; P20340; H7BYW1; F5H668; H0YGL6; P20340-3;F5GZB1; F5H3K7; F5GXN4	Ras-related protein Rab-6A	RAB6A
5.32356	9.54388	O95782-2; O95782	AP-2 complex subunit alpha-1	AP2A1
4.24067	9.40865	Q86SQ0; E9PGF6; G5E9V3	Pleckstrin homology-like domain family B member 2	PHLDB2
3.71006	9.31575	P11717	Cation-independent mannose-6-phosphate receptor	IGF2R
4.27555	9.15287	P35579; P35579-2	Myosin-9	MYH9
6.23182	9.09535	Q9UHB6; Q9UHB6-4; F8VQE1; Q9UHB6-2; F8VS07; Q9UHB6-3	LIM domain and actin-binding protein 1	LIMA1
3.28903	8.9955	P09497-2; P09497	Clathrin light chain B	CLTB
5.14108	8.88569	E9PGR2; O14976	Cyclin-G-associated kinase	GAK
5.99204	8.76585	Q8N4B1; Q8N4B1-2	Sesquipedalian-1	FAM109A
5.68487	8.50425	Q6ICB4	Sesquipedalian-2	FAM109B
1.43574	8.48295	P12270	Nucleoprotein TPR	TPR
6.21345	8.37521	J3KNL6; O15027-2; O15027-4; O15027-3;O15027; O15027-5	Protein transport protein Sec16A	SEC16A
3.91572	8.36748	E9PMS6; Q8WWI1-3; E9PLH4; E9PMT2; Q8WWI1-4; F8WD26; Q8WWI1-2; J3KP06; Q8WWI1; E9PMP7; H0Y424	LIM domain only protein 7	LMO7
5.44778	8.34776	O75165	DnaJ homolog subfamily C member 13	DNAJC13
2.59762	8.24185	O00443; F5H2B0	Phosphatidylinositol 4-phosphate 3-kinase C2 domain-containing subunit alpha	PIK3C2A
7.11087	8.18457	B4DQA8; K7EJC8; E9PCW1; O95249; G5E9T8; F6RU00; J3KST5	Golgi SNAP receptor complex member 1	GOSR1
5.39597	8.18273	P62820; E7END7; P62820-2; B7Z8M7	Ras-related protein Rab-1A	RAB1A
6.87411	8.12454	Q08379; Q08379-2	Golgin subfamily A member 2	GOLGA2
1.93483	8.06158	Q8IUD2; Q8IUD2-3; G8JLD3; Q8IUD2-2; Q8IUD2-4; Q8IUD2-5	ELKS/Rab6-interacting/CAST family member 1	ERC1
5.29131	7.81027	Q86SQ0-2; E9PFQ4		PHLDB2
3.97368	7.60841	Q96CW1-2; Q96CW1; E9PFW3	AP-2 complex subunit mu	AP2M1
4.99079	7.45095	Q9UEU0; Q9UEU0-2; H0YJL5	Vesicle transport through interaction with t-SNAREs homolog 1B	VTI1B
6.27156	7.41053	G3V1S6; Q10471	Polypeptide N-acetylgalactosaminyltransferase 2; Polypeptide N-acetylgalactosaminyltransferase 2 soluble form	GALNT2
5.63556	6.97709	Q8N3K9	Cardiomyopathy-associated protein 5	CMYA5
4.7357	6.97323	K7EN12; Q9NW61; K7EIW9	Pleckstrin homology domain-containing family J member 1	PLEKHJ1
3.94655	6.84009	Q13492-3; Q13492-2; Q13492-5; Q13492; Q13492-4; H0YCY1	Phosphatidylinositol-binding clathrin assembly protein	PICALM
4.39568	6.82128	O94875-9; J3KNZ5; H7BXR4; O94875; O94875-3; O94875-8; O94875-2; O94875-4; O94875-10;O94875-7;H7BZK1;H7BXR3;O94875-5	Sorbin and SH3 domain-containing protein 2	SORBS2
2.69982	6.72321	P68133; P68032; Q5T8M8; A6NL76; P63267; P62736; F8WB63; B8ZZJ2; C9JFL5; F6UVQ4; F6QUT6	Actin, alpha skeletal muscle; Actin, alpha cardiac muscle 1; Actin, gamma-enteric smooth muscle; Actin, aortic smooth muscle	ACTA1; ACTC1; ACTG2; ACTA2
2.81077	6.44027	Q13813-3; Q13813; Q13813-2; A6NG51	Spectrin alpha chain, non-erythrocytic 1	SPTAN1
4.2523	6.37232	P14373-2; P14373	Zinc finger protein RFP	TRIM27
3.80353	6.35809	Q01082; Q01082-2	Spectrin beta chain, non-erythrocytic 1	SPTBN1
3.80969	6.25207	I3L1K7; I3L4Z6; O14653-3; O14653; O14653-2; E7EQ34; I3L3V4; I3L0K1	Golgi SNAP receptor complex member 2	GOSR2
3.21158	6.1719	F8VPF3; F8W1R7; P60660-2; P60660; J3KND3; G8JLA2; G3V1V0; B7Z6Z4; F8VZV5; F8VZU9; G3V1Y7; F8W180	Myosin light polypeptide 6	MYL6
5.06317	6.13102	O43795-2; E9PDF6; O43795; H7C2Y7; E7EPB4	Unconventional myosin-Ib	MYO1B
4.3193	6.119	Q9UNK0; K7EQB1	Syntaxin-8	STX8
3.92098	6.08491	Q12965	Unconventional myosin-Ie	MYO1E
0.88423	6.02083	Q562R1	Beta-actin-like protein 2	ACTBL2
4.34015	6.01912	Q9NRW7; F5GYC3; F5H8K1	Vacuolar protein sorting-associated protein 45	VPS45
5.1846	6.01506	Q8WU79-3; Q8WU79-2; Q8WU79	Stromal membrane-associated protein 2	SMAP2
2.1996	5.98051	O15083; H7C4G9	ERC protein 2	ERC2
2.53577	5.88175	Q7Z451; K7EJT8; P63010; P63010-2; C9J1E7; Q10567-4; Q10567-3; Q10567-2; Q10567	AP-2 complex subunit beta;AP-1 complex subunit beta-1	AP2B1; AP1B1
2.35978	5.86884	P62158; H0Y7A7; F8WBR5; M0QZ52; G3V479	Calmodulin	CALM1; CALM2
5.12783	5.84835	Q9NYZ3	G2 and S phase-expressed protein 1	GTSE1
4.2834	5.81306	Q14677-2; Q14677-3
4.08721	5.70727	Q5U8S2; O60499; O60499-2; F6RTM7; K7EK75; K7ELY2; K7EIY4	Syntaxin-10	STX10
2.12646	5.66629	D6R9W4; Q16643; A8MV58; Q16643-2; D6RFI1	Drebrin	DBN1
4.3789	5.62091	P53675; P53675-2; J3KR87	Clathrin heavy chain 2	CLTCL1
3.88824	5.55252	Q8IVT2	Uncharacterized protein C19orf21	C19orf21
4.18311	5.46148	E9PQA5; E9PQ47; E9PNY1; O95159; H0YCU8; E9PMQ3	Zinc finger protein-like 1	ZFPL1
4.55888	5.33787	K7ERI8; P51148; P51148-2; K7ERQ8; F8VWU4; F8VVZ0; F8VUA5; F8VVK3; K7ENY4; P61020-2; B4DJA5; P61020; P20339	Ras-related protein Rab-5C; Ras-related protein Rab-5B; Ras-related protein Rab-5A	RAB5C; RAB5B; RAB5A
5.30436	5.32454	P06241-3; Q5R3A8; B3KPS6; P06241-2; P06241; P07947; J3QRU1; P12931; P12931-2	Tyrosine-protein kinase Fyn; Tyrosine-protein kinase Yes; Proto-oncogene tyrosine-protein kinase Src	FYN; YES1; SRC
4.23085	5.30553	Q8NBJ4-2; Q8NBJ4	Golgi membrane protein 1	GOLM1
3.27086	5.29221	H7C152; Q7Z3C6-2; Q7Z3C6; H7C1G6	Autophagy-related protein 9A	ATG9A
2.52	5.22956	F8W785; O00461	Golgi integral membrane protein 4	GOLIM4
4.83965	5.22494	Q9NSY1; Q9NSY1-2; Q9NSY1-3; H0Y9P1	BMP-2-inducible protein kinase	BMP2K
4.66701	5.2199	O75396	Vesicle-trafficking protein SEC22b	SEC22B
4.25442	5.13517	Q07912-2; Q07912; C9J1X3; Q07912-3; H7BZZ3	Activated CDC42 kinase 1	TNK2
4.51492	5.12764	B3KXH8; Q9Y5X1	Sorting nexin-9	SNX9
3.22102	5.0779	P15291-2; P15291; Q86XA6	Beta-1,4-galactosyltransferase 1; Lactose synthase A protein; N-acetyllactosamine synthase; Beta-N-acetylglucosaminylglycopeptide beta-1,4-galactosyltransferase ;Beta-N-acetylglucosaminyl-glycolipid beta-1,4-galactosyltransferase; Processed beta-1,4-galactosyltransferase 1	B4GALT1
2.13314	5.04792	F5H6E2; O00159-3; O00159	Unconventional myosin-Ic	MYO1C
1.80427	4.8023	P02786; F5H6B1; G3V0E5	Transferrin receptor protein 1;Transferrin receptor protein 1, serum form	TFRC
1.71756	4.78082	P49755; G3V2K7	Transmembrane emp24 domain-containing protein 10	TMED10
2.71486	4.66571	P63261; I3L3I4; I3L3I0; I3L1U9	Actin, cytoplasmic 2;Actin, cytoplasmic 2, N-terminally processed	ACTG1
3.43314	4.65906	B1AK87; P47756-2; P47756; B1AK88; F6USW4; B1AK85	F-actin-capping protein subunit beta	CAPZB
5.51903	4.64243	Q01650	Large neutral amino acids transporter small subunit 1	SLC7A5
3.49204	4.60425	Q15773	Myeloid leukemia factor 2	MLF2
4.47382	4.59923	Q92896; Q92896-3; Q92896-2	Golgi apparatus protein 1	GLG1
5.06946	4.59804	E7ERC8; A8MXL6; P55735-2; P55735; B4DXJ1	Protein SEC13 homolog	SEC13
2.40308	4.53083	B4DFA2; I3L0N3; P46459	Vesicle-fusing ATPase	NSF
2.8086	4.43462	P08195-2; P08195-3; F5GZS6; P08195; J3KPF3; P08195-4; F5GZR9; F5H867; F5H0E2; H0YFS2	4F2 cell-surface antigen heavy chain	SLC3A2
5.36174	4.42997	O15260-2; Q5T8U5; Q5T8U7; O15260	Surfeit locus protein 4	SURF4
4.1781	4.34999	Q8N3V7-3; Q8N3V7-2; Q8N3V7	Synaptopodin	SYNPO
2.5597	4.2946	H0Y8X9; P98194-2; E7ERC6; P98194-4; H0Y9V7; P98194; P98194-3; P98194-8; P98194-5; P98194-6; P98194-7; H0Y9S7	Calcium-transporting ATPase type 2C member 1	ATP2C1
6.36299	4.28593	P60709; Q5T8M7	Actin, cytoplasmic 1; Actin, cytoplasmic 1, N-terminally processed	ACTB; ACTA1
3.90934	4.24119	Q9Y3B3-2; Q9Y3B3; Q6JUT2; G3V2Y2	Transmembrane emp24 domain-containing protein 7	TMED7; TIRAP3
5.09143	4.22585	Q9HC52	Chromobox protein homolog 8	CBX8
2.68497	4.22542	P31947-2; P31947	14-3-3 protein sigma	SFN
2.35093	4.21445	B0YJC4; P08670	Vimentin	VIM
1.86527	4.09723	E9PH29; P30048	Thioredoxin-dependent peroxide reductase, mitochondrial	PRDX3
2.78908	4.04398	H0YKU1; H0YNJ8; Q9NYL9	Tropomodulin-3	TMOD3
3.17431	3.97794	C9IZZ0; C9J4V0; C9J8S3; P51149; C9J7D1; C9J4S4; C9J592	Ras-related protein Rab-7a	RAB7A
4.16194	3.97119	Q9BVK6	Transmembrane emp24 domain-containing protein 9	TMED9
2.67057	3.96524	C9J880; Q68CQ7-2; Q68CQ7	Glycosyltransferase 8 domain-containing protein 1	GLT8D1
3.13327	3.94243	Q8WVM8; B7Z5N7; B7Z594; B7Z4U7; B7Z738	Sec1 family domain-containing protein 1	SCFD1
4.08722	3.85684	G3V3Z8; P49757-4; P49757-2; P49757-3; P49757; B1P2N8; B1P2N7; B1P2N6; B1P2N5	Protein numb homolog	NUMB
1.26754	3.8236	P08238	Heat shock protein HSP 90-beta	HSP90AB1
3.66468	3.67912	Q96K37-2; H7C1I0; Q96K37	Solute carrier family 35 member E1	SLC35E1
2.79862	3.6618	Q9H0U4; E9PLD0; Q92928	Ras-related protein Rab-1B; Putative Ras-related protein Rab-1C	RAB1B; RAB1C
3.87143	3.6466	O14662-2; O14662-3; Q96NX8; O14662-4; C9K0W8; O14662-5; O14662; G8JLE0; H3BU86	Syntaxin-16	STX16; STX16-NPEPL1
2.13907	3.62637	O43175; Q5SZU1	D-3-phosphoglycerate dehydrogenase	PHGDH
1.95294	3.56661	P13639	Elongation factor 2	EEF2
2.24047	3.47186	H3BND8; F5H8E5; B7Z815; Q93009	Ubiquitin carboxyl-terminal hydrolase; Ubiquitin carboxyl-terminal hydrolase 7	USP7
1.62042	3.41451	P48634-2; P48634-3; P48634; P48634-4	Protein PRRC2A	PRRC2A
2.62533	3.35205	O43747; O43747-2; J3KQU9; B3KXW5	AP-1 complex subunit gamma-1	AP1G1
3.30825	3.33196	P52907	F-actin-capping protein subunit alpha-1	CAPZA1
3.20076	3.31916	Q8WUD6-2; F8W1B3; Q8WUD6	Cholinephosphotransferase 1	CHPT1
6.16645	3.29715	P08754; P63096; P09471-2; P09471; P04899; P04899-4	Guanine nucleotide-binding protein G(k) subunit alpha; Guanine nucleotide-binding protein G(i) subunit alpha-1; Guanine nucleotide-binding protein G(o) subunit alpha; Guanine nucleotide-binding protein G(i) subunit alpha-2	GNAI3;GNAI1;GNAO1;GNAI2
2.01068	3.28531	H3BTN5; P14618-2; P14618; H3BQ34; H3BT25; H3BUW1; H3BTJ2; P14618-3	Pyruvate kinase; Pyruvate kinase isozymes M1/M2	PKM
1.71894	3.28292	Q9GZR2	RNA exonuclease 4	REXO4
1.93494	3.27408	P19105; O14950; J3QRS3; J3KTJ1; P24844	Myosin regulatory light chain 12A; Myosin regulatory light chain 12B; Myosin regulatory light polypeptide 9	MYL12A; MYL12B; MYL9
1.70847	3.17044	Q01780; Q01780-2	Exosome component 10	EXOSC10
2.15268	3.13664	P10809	60 kDa heat shock protein, mitochondrial	HSPD1
1.42695	3.12138	P62826; B5MDF5; J3KQE5; F5H018	GTP-binding nuclear protein Ran	RAN
4.88518	2.99128	O75955; A2AB13; B0V2I8; A2AB12; A2AB10; B4DVY7	Flotillin-1	FLOT1
1.62087	2.96368	E9PJJ7; O94973; O94973-2; O94973-3	AP-2 complex subunit alpha-2	AP2A2
2.90318	2.9364	M0R0Y2; P54920; M0R213; M0R2M1	Alpha-soluble NSF attachment protein	NAPA
2.69093	2.9256	Q7LGA3-3; Q7LGA3-2; A6ND99; Q7LGA3	Heparan sulfate 2-O-sulfotransferase 1	HS2ST1
3.26508	2.91386	Q15149-7; Q15149-8; Q15149-9; Q15149-5; Q15149-4; Q15149-6; Q15149-3; Q15149-2; Q15149	Plectin	PLEC
2.80425	2.77815	P07900; P07900-2; Q86U12	Heat shock protein HSP 90-alpha	HSP90AA1
1.79598	2.75901	F5GWT4; Q9H4A3-2; Q9H4A3; Q9H4A3-5; Q9H4A3-6; F5H2M7; Q9H4A3-4	Serine/threonine-protein kinase WNK1	WNK1
2.17498	2.75407	P06858	Lipoprotein lipase	LPL
2.40389	2.61992	F8VUY8; Q96QD8	Sodium-coupled neutral amino acid transporter 2	SLC38A2
2.89091	2.52007	G3V1U5; Q9Y3E0	Vesicle transport protein GOT1B	GOLT1B
2.76528	2.50481	Q14789; Q14789-2; H0Y867; E7EU81	Golgin subfamily B member 1	GOLGB1
2.64758	2.43501	E7ETM8; E7EUA0; H7BXY5; Q0ZGT2-4; Q0ZGT2-3; Q0ZGT2-2; Q0ZGT2	Nexilin	NEXN
2.86692	2.39337	Q15717; B4DVB8	ELAV-like protein 1	ELAVL1
5.31921	2.36319	Q92522	Histone H1x	H1FX
3.89497	2.28205	P35580; P35580-2; F8W6L6; P35580-3; P35580-4	Myosin-10	MYH10
