# Supplementary figures and images for: A role of OCRL in clathrin-coated pit dynamics and uncoating revealed by studies of Lowe syndrome cells
Source: eLife journal article supplement (doi:10.7554/elife.02975), 2014-08-08

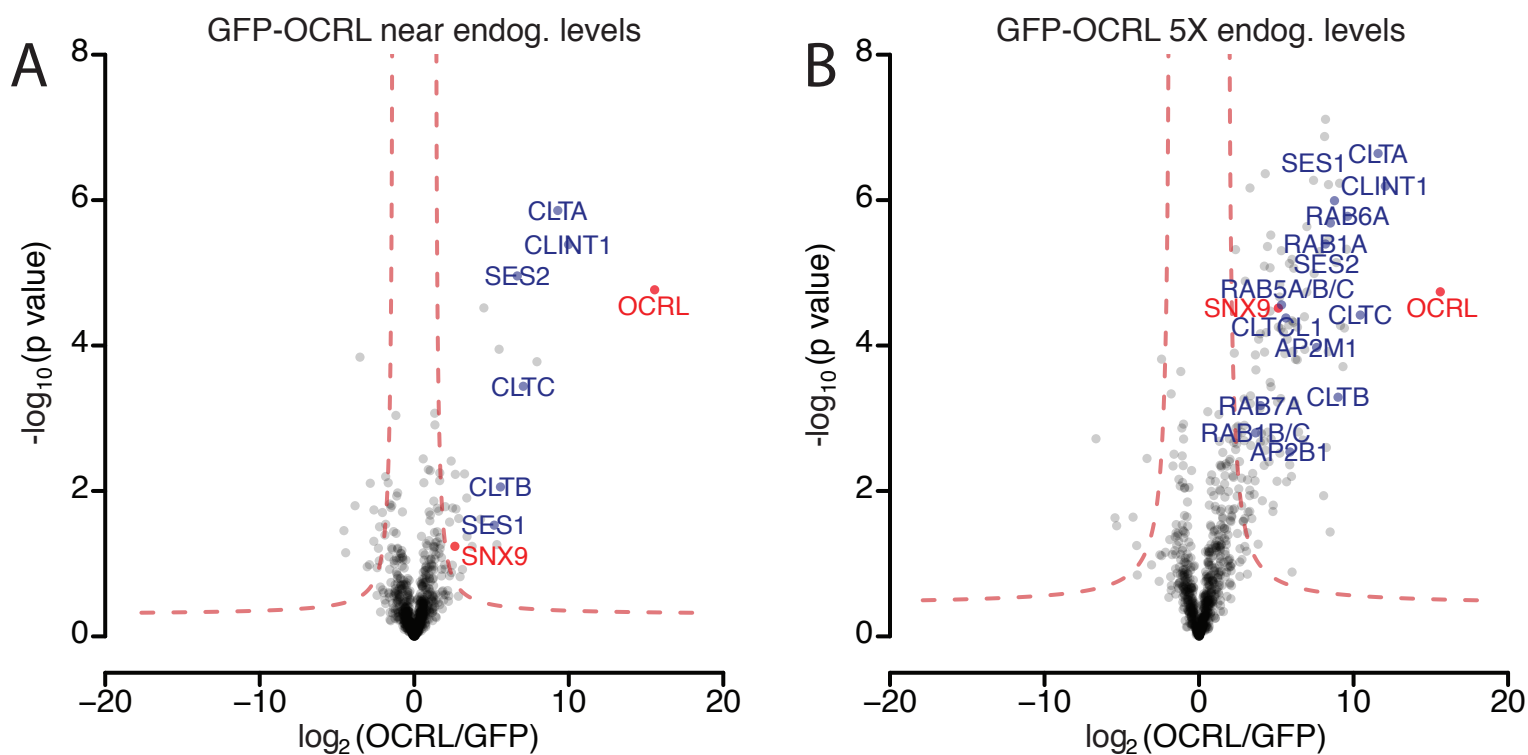

Figure 1 - figure supplement 1. Nandez, Balkin *et al.*

Supplement: supp [file elife_poa_e02975_Figure_1_figure_supplement_1.pdf › elife_poa_e02975_Figure_1_figure_supplement_1.pdf]

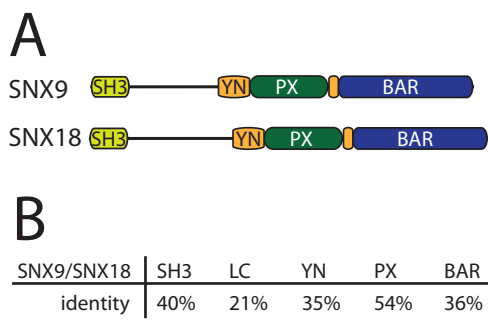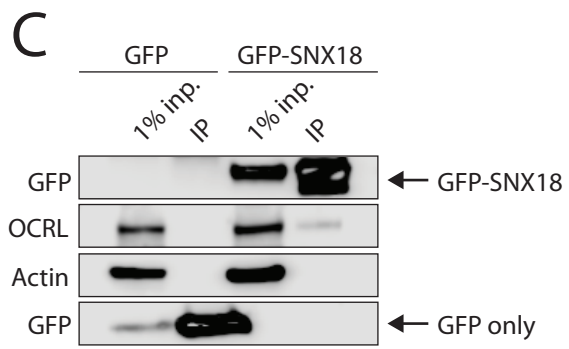

Figure 2 - figure supplement 1. Nandez, Balkin *et al.*

Supplement: supp [file elife_poa_e02975_Figure_2_figure_supplement_1.pdf › elife_poa_e02975_Figure_2_figure_supplement_1.pdf]

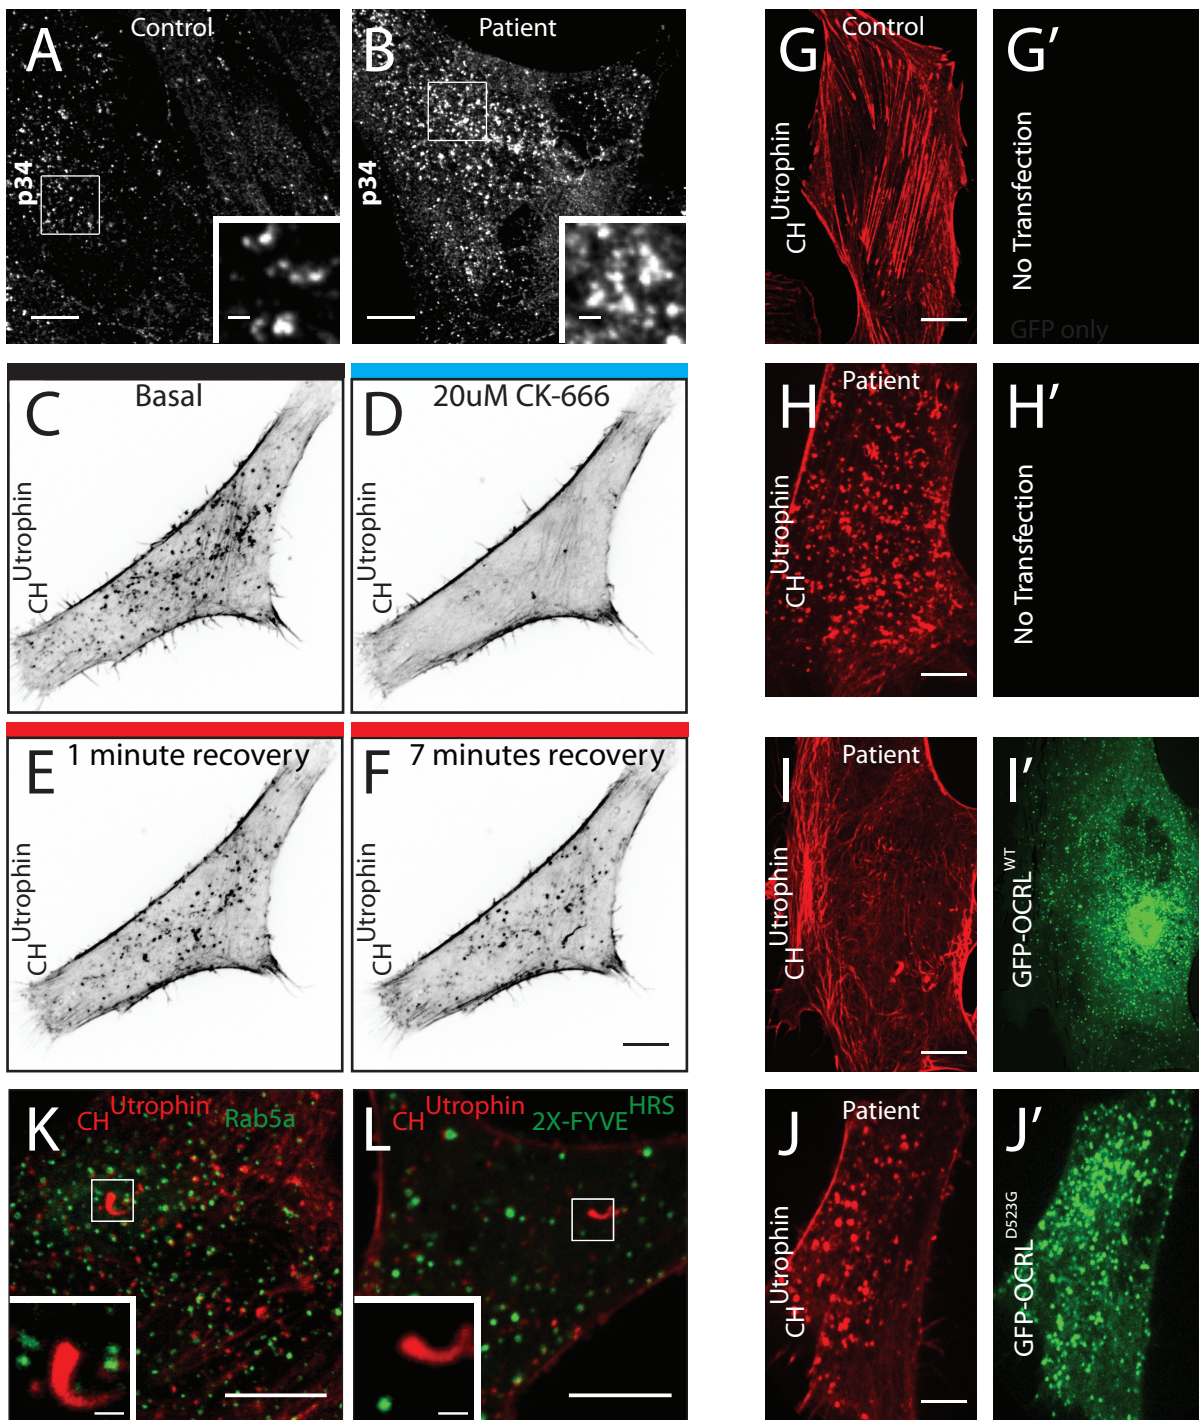

Figure 5 - figure supplement 1. Nandez, Balkin *et al.*

Supplement: supp [file elife_poa_e02975_Figure_5_figure_supplement_1.pdf › elife_poa_e02975_Figure_5_figure_supplement_1.pdf]

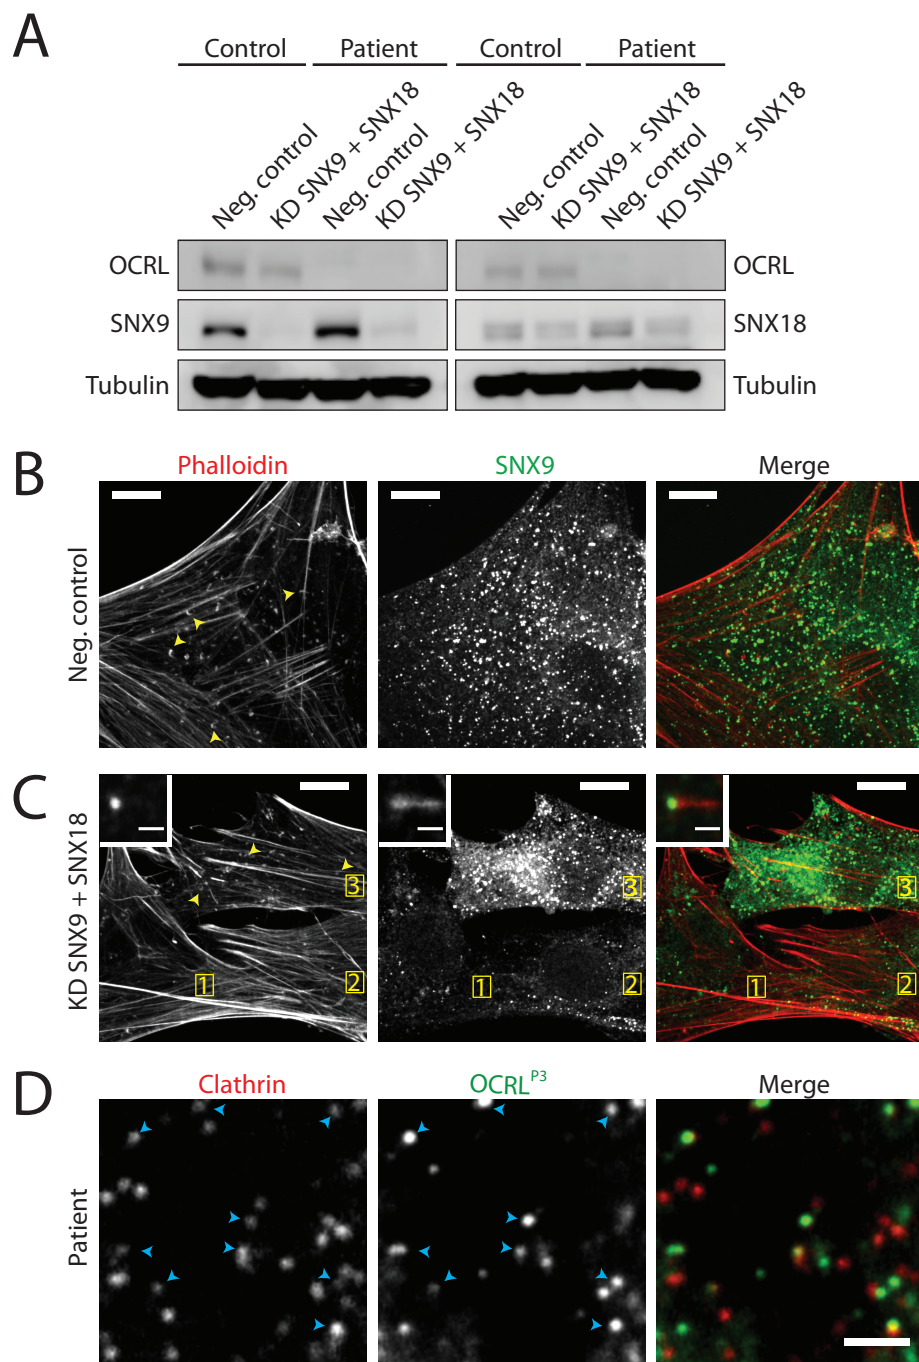

Figure 5 - figure supplement 2. Nandez, Balkin *et al.*

Supplement: supp [file elife_poa_e02975_Figure_5_figure_supplement_2.pdf › elife_poa_e02975_Figure_5_figure_supplement_2.pdf]

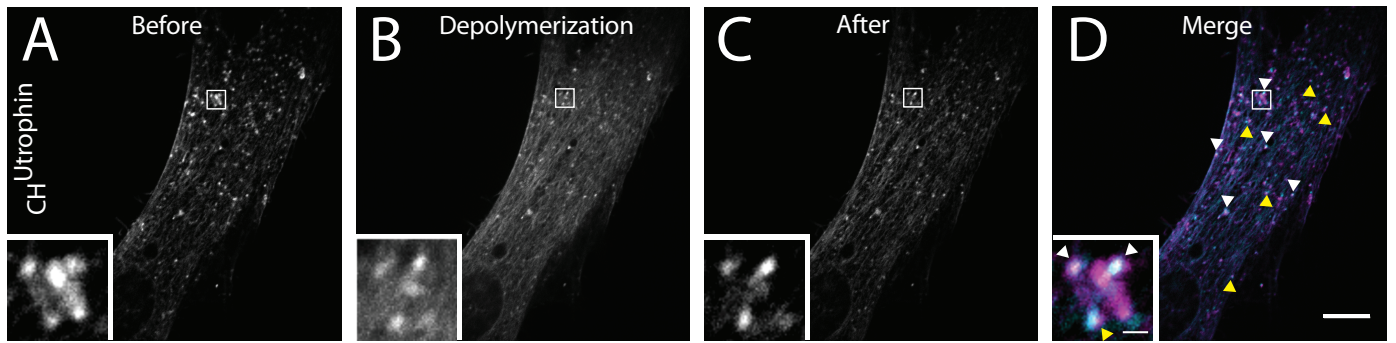

Figure 6 - figure supplement 1. Nandez, Balkin *et al.*

Supplement: supp [file elife_poa_e02975_Figure_6_figure_supplement_1.pdf › elife_poa_e02975_Figure_6_figure_supplement_1.pdf]

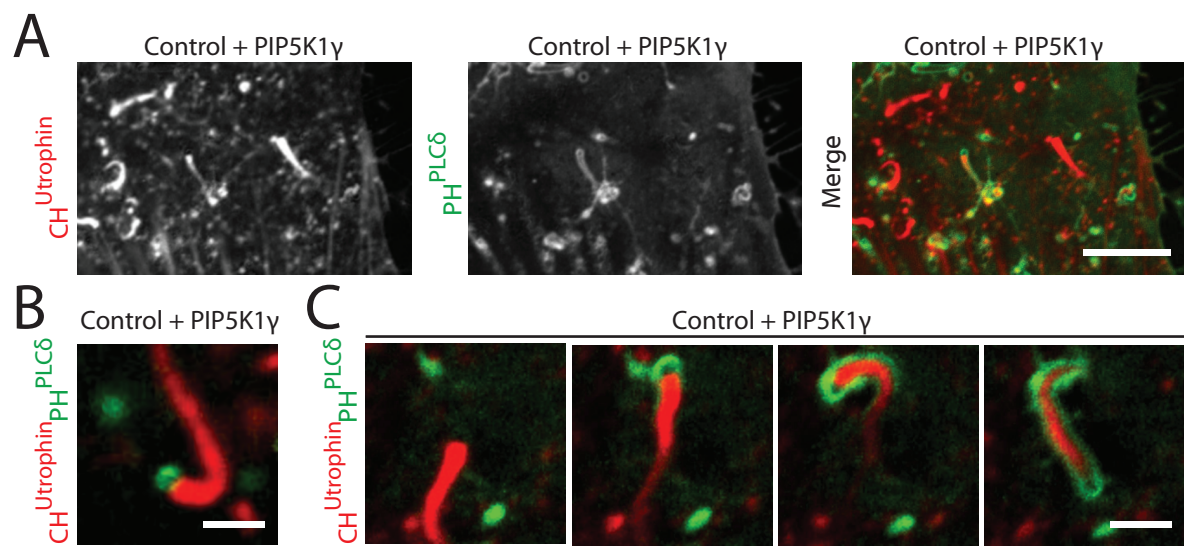

Figure 7 - figure supplement 1. Nandez, Balkin *et al.*

Supplement: supp [file elife_poa_e02975_Figure_7_figure_supplement_1.pdf › elife_poa_e02975_Figure_7_figure_supplement_1.pdf]
